# Supplementary material for: Optimal time of tumour response evaluation and effectiveness of hypofractionated proton beam therapy for inoperable or recurrent hepatocellular carcinoma
Source: PubMed Central journal article supplement (PMC5790519; doi:10.18632/oncotarget.23428), 2017-12-19
Supplement: oncotarget-09-4034-s001.pdf [file oncotarget-09-4034-s001.pdf]

## Optimal time of tumour response evaluation and effectiveness of hypofractionated proton beam therapy for inoperable or recurrent hepatocellular carcinoma

### SUPPLEMENTARY MATERIALS

Supplementary Table 1: Comparison of clinical characteristics according to tumour response

| Characteristics           |        | Tumour response  |                      | <i>p</i> -value* |
|---------------------------|--------|------------------|----------------------|------------------|
|                           |        | CR, <i>n</i> (%) | Non-CR, <i>n</i> (%) |                  |
| Gender                    | Male   | 55 (91.7)        | 5 (8.3)              | 1.000            |
|                           | Female | 11 (100)         | 0 (0)                |                  |
| Age, years                | <60    | 20 (90.9)        | 2 (9.1)              | 0.642            |
|                           | ≥60    | 46 (93.9)        | 3 (6.1)              |                  |
| Aetiology of LC           | HBV    | 53 (93.0)        | 4 (7.0)              | 1.000            |
|                           | Others | 13 (92.9)        | 1 (7.1)              |                  |
| Child–Pugh Classification | A      | 64 (94.1)        | 4 (5.9)              | 0.199            |
|                           | B      | 2 (66.7)         | 1 (33.3)             |                  |
| AFP, ng/mL                | <10    | 41 (95.3)        | 2 (4.7)              | 0.376            |
|                           | ≥10    | 25 (89.3)        | 3 (10.7)             |                  |
| Tumour size, cm           | <3     | 59 (92.2)        | 5 (7.8)              | 1.000            |
|                           | ≥3     | 7 (100)          | 0 (0)                |                  |
| AJCC stage                | I–II   | 61 (92.4)        | 5 (7.6)              | 1.000            |
|                           | IIIA   | 5 (100)          | 0 (0)                |                  |
| BCLC stage                | A      | 41 (95.3)        | 2 (4.7)              | 0.367            |
|                           | B      | 25 (89.3)        | 3 (10.7)             |                  |
| Pre-Tx to PBT site        | No     | 16 (100)         | 0 (100)              | 0.581            |
|                           | Yes    | 50 (90.9)        | 5 (9.1)              |                  |
| Pre-Tx to other site      | No     | 10 (90.9)        | 1 (9.1)              | 0.581            |
|                           | Yes    | 56 (6.7)         | 4 (9.3)              |                  |

Abbreviations: same as in Table 1.

\*Fisher's exact test, two-tail.

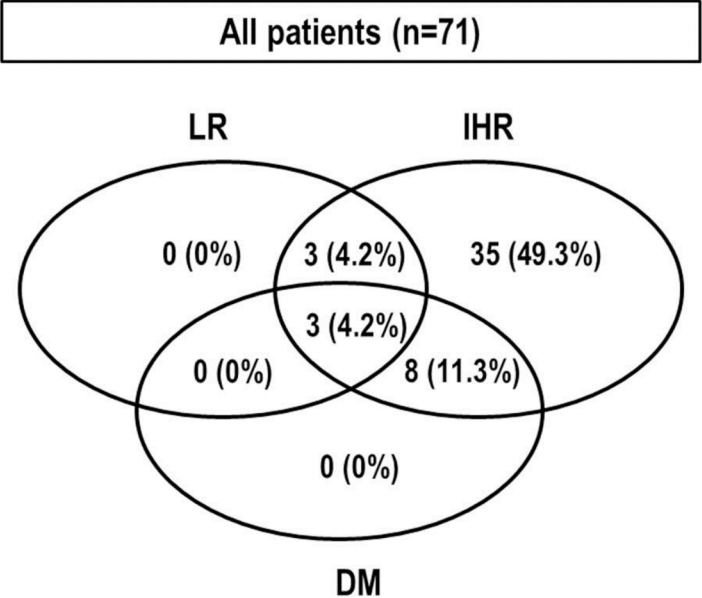

**Supplementary Figure 1: Patterns of treatment failure in all patients.** Abbreviations: LR, local recurrence; IHR, intrahepatic recurrence; and DM, distant metastasis.
